# Supplementary material for: A Theranostic Approach in SIRT: Value of Pre-Therapy Imaging in Treatment Planning
Source: MDPI journal article supplement (doi:10.3390/jcm11237245), 2022-12-06
Supplement: s1 [file s1]

**Table S1.** Studies comparing the tumor and normal liver absorbed doses using MAA SPECT/CT to  $^{90}\text{Y}$  post treatment imaging using the Pearson coefficient for measuring the strength of the correlation.

| Study                               | Type of micropsheres | Post therapy imaging   | Type of tumors | Nb of patients | Nb of tumors | TD correlation (Pearson coefficient) | NTLD correlation (Pearson coefficient) |
|-------------------------------------|----------------------|------------------------|----------------|----------------|--------------|--------------------------------------|----------------------------------------|
| Song et al. 2015 [30]               | resin                | $^{90}\text{Y}$ PET/CT | HCC, CGC, mets | 23             | NA           | 0.64                                 | 0.71*                                  |
| Gnesin et al. 2016 [31]             | glass                | $^{90}\text{Y}$ PET/CT | HCC            | 7              | 11           | 0.56                                 | 0.99*                                  |
| Gnesin et al. 2016 [31]             | resin                | $^{90}\text{Y}$ PET/CT | HCC            | 20             | 30           | 0.74                                 | 0.93*                                  |
| Haste et al. 2017 [35]*             | glass                | $^{90}\text{Y}$ PET/CT | HCC            | 73             | 63           | 0.57                                 | 0.94                                   |
| Kafrouni et al. 2019 [36]           | glass                | $^{90}\text{Y}$ PET/CT | HCC            | 23             | 24           | 0.87                                 | 0.91                                   |
| Richetta et al. 2019 [32]           | resin                | $^{90}\text{Y}$ PET/CT | HCC            | 10             | 10           | 0.91                                 | 0.97                                   |
| Jafargholi Rangraz et al. 2020 [33] | resin                | $^{90}\text{Y}$ PET/CT | HCC and mets   | 31             | 67           | 0.62                                 | 0.94                                   |
| d'Abadie et al. 2021 [34]           | resin                | $^{90}\text{Y}$ PET/CT | HCC and mets   | 66             | 171          | 0.65                                 | 0.97                                   |
| Kokabi et al. 2022 [25]             | resin                | $^{90}\text{Y}$ PET/CT | HCC            | 30             | 33           | 0.74                                 | 0.93*                                  |

HCC: hepatocellular carcinoma; CGC: cholangiocarcinoma; mets: metastases; NA: not available; Nb: Number; TD: Tumor absorbed dose; NTLD: non-tumoural liver absorbed dose, \* NTLD referred to the non tumoural liver only targeted by SIRT + MAA SPECT performed without CT (no attenuation and scatter correction).

**Table S2.** Studies evaluating the accuracy of the prediction of tumor to normal liver uptake (TNR) with MAA SPECT/CT.

| Studies                     | Type | Post treatment imaging   | Number of patients | Number of tumors | Pearson coefficient |
|-----------------------------|------|--------------------------|--------------------|------------------|---------------------|
| Debede et al. 2018 [37]     | NA   | <sup>90</sup> Y SPECT/CT | 12                 | 12               | 0.9                 |
| Villalobos et al. 2021 [39] | HCC  | <sup>90</sup> Y SPECT/CT | 190                | NA               | 0.54                |
| Son et al. 2021 [38]        | HCC  | <sup>90</sup> Y PET/CT   | 34                 | 45               | 0.79                |
| Meine et al. 2021 [40]      | HCC  | <sup>90</sup> Y PET/CT   | 22                 | 31               | 0.71                |
| Kokabi et al. 2022 [25]     | HCC  | <sup>90</sup> Y PET/CT   | 30                 | 33               | 0.53                |

NA: Not available; HCC: hepatocellular carcinoma
